# Supplementary material
Source: Royal Society of Chemistry journal article supplement (doi:10.1039/d6cp00571c)
Supplement: d6cp00571c1.pdf [file d6cp00571c1.pdf]

***[Electronic Supplementary Information]***

Title:  **$\psi$ -BCN Monolayers as Emerging 2D Materials: Effects of Hydrogen Passivation on Structure, Stability, and Functionality**

Authors: Dilna Azhikodan,<sup>a</sup> Debesh R. Roy,<sup>b</sup> Marcus Einert,<sup>c</sup> Siby Thomas<sup>d,\*</sup> and Vipin Kumar<sup>c,\*</sup>

Organization: <sup>a</sup>Cochin University of Science and Technology, Kalamassery, Kochi, 682022, Kerala, India

<sup>b</sup>Materials and Biophysics Group, Department of Physics, Sardar Vallabhbhai National Institute of Technology, Surat, 395007, India

<sup>c</sup>Surface Science Laboratory, Department of Materials- and Geosciences, Technical University of Darmstadt, Peter-Grünberg-Straße 4, 64287, Darmstadt, Germany

Email: [vkumar@surface.tu-darmstadt.de](mailto:vkumar@surface.tu-darmstadt.de)

<sup>d</sup>Department of Mechanical Engineering, Colorado School of Mines, 1500 Illinois St., Golden, Colorado, 80401, USA

Email: [siby.thomas@mines.edu](mailto:siby.thomas@mines.edu)

- Figure S1.** Initial and optimized configuration with different ratio of B, C, and N atoms with relative energy ( $\Delta E$ )
- Figure S2.** Hydrogen passivation on multiple different atomic sites (a) H-passivation on B and C atoms (b) H-passivation on B and N atoms
- Figure S3.** Polar plots of (a) directional Young's modulus and (b) directional Poisson's ratio for hydrogenated  $\psi$ -BCN monolayers in comparison with pristine  $\psi$ -BCN.
- Figure S4.** Total potential energy fluctuation of the  $\psi$ -BCN monolayer at 300 K, 600 K, and 1000 K during the AIMD simulations. The right panels display the final structural snapshots at each temperature, confirming the thermal stability and structural integrity of the monolayer.
- Figure S5.** Total potential energy fluctuation of the hydrogenated  $\psi$ -BCN monolayer at 1000 K during the AIMD simulations. The right panels display the final structural snapshots of each hydrogenated structure, confirming the thermal stability and structural integrity of the monolayer.
- Figure S6.** Electron localization function (ELF) maps of  $\psi$ -BCN monolayers: (a) pristine  $\psi$ -BCN, (b)  $\psi$ -B<sub>H</sub>CN, (c)  $\psi$ -BC<sub>H</sub>N, and (d)  $\psi$ -BCN<sub>H</sub>. Nitrogen atoms are shown in blue, boron in green, and carbon in grey. The color scale (0.0-1.0) indicates the degree of electron localization, with higher values representing stronger localization. Hydrogenation at C and B maintains the overall ELF topology, whereas hydrogenation at N leads to pronounced localization around the N-H bond and noticeable perturbation of nearby bonding regions.

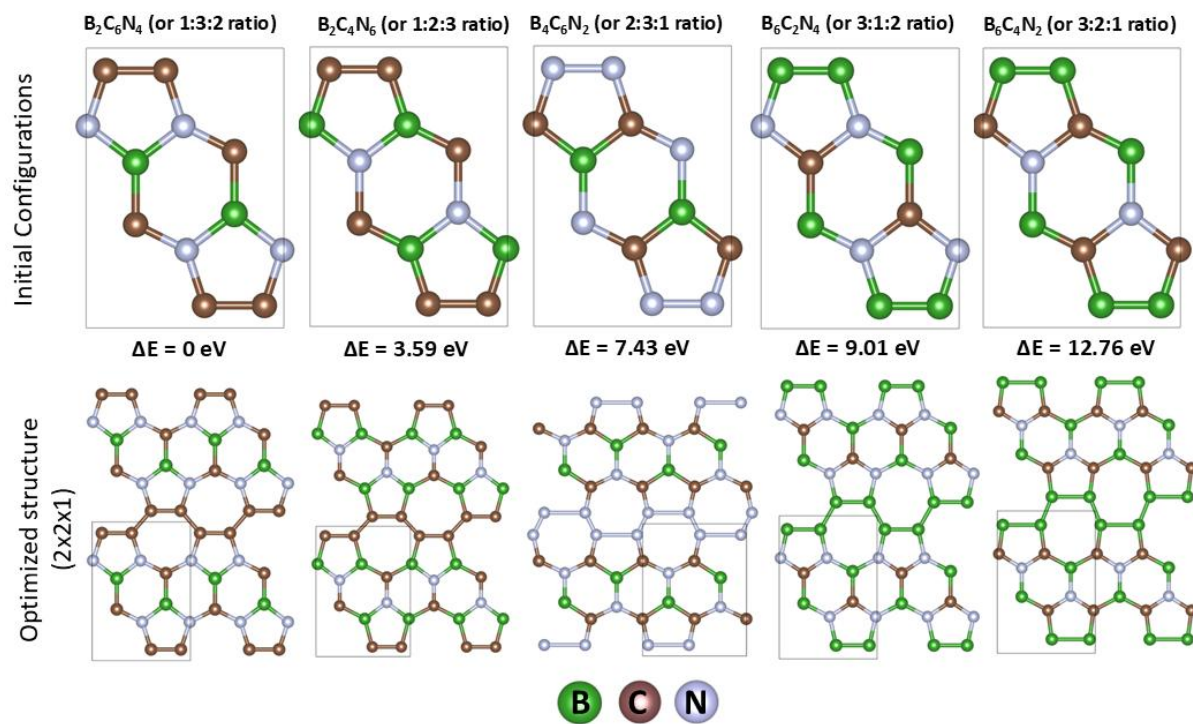

**Figure S1**

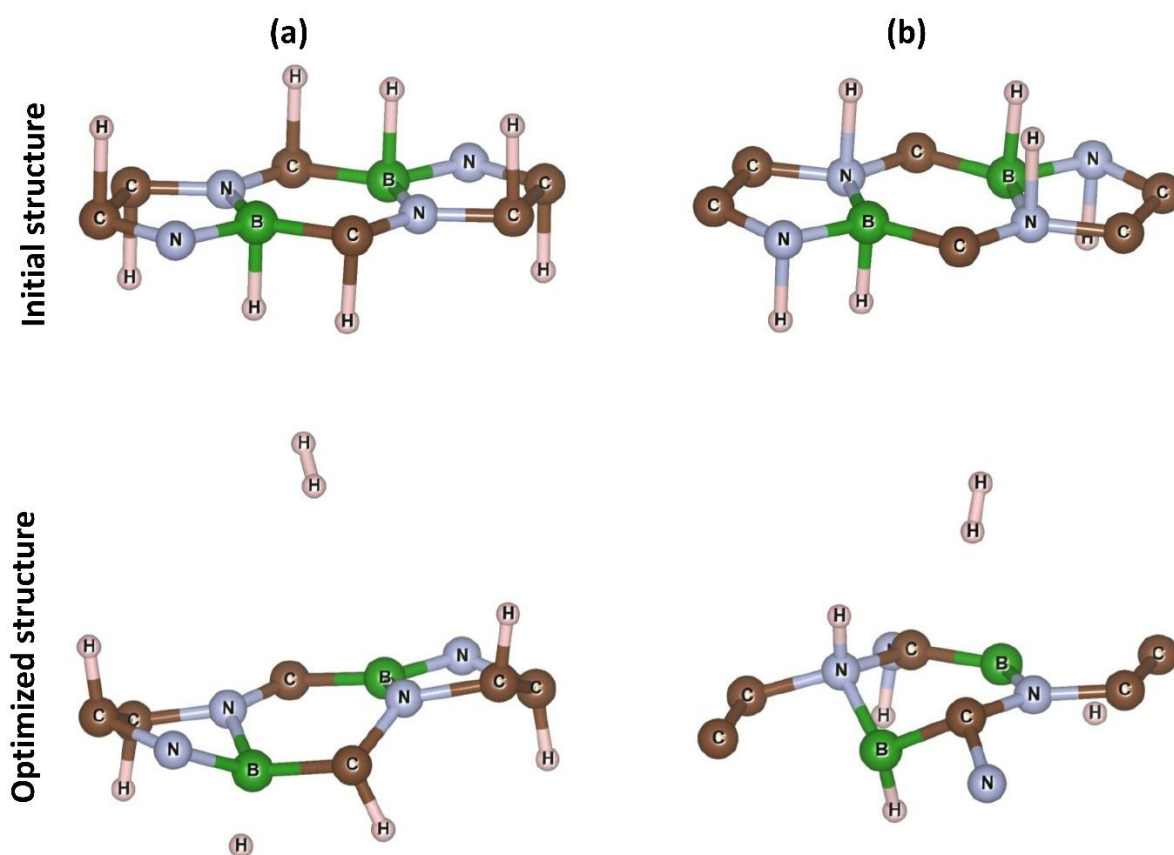

**Figure S2**

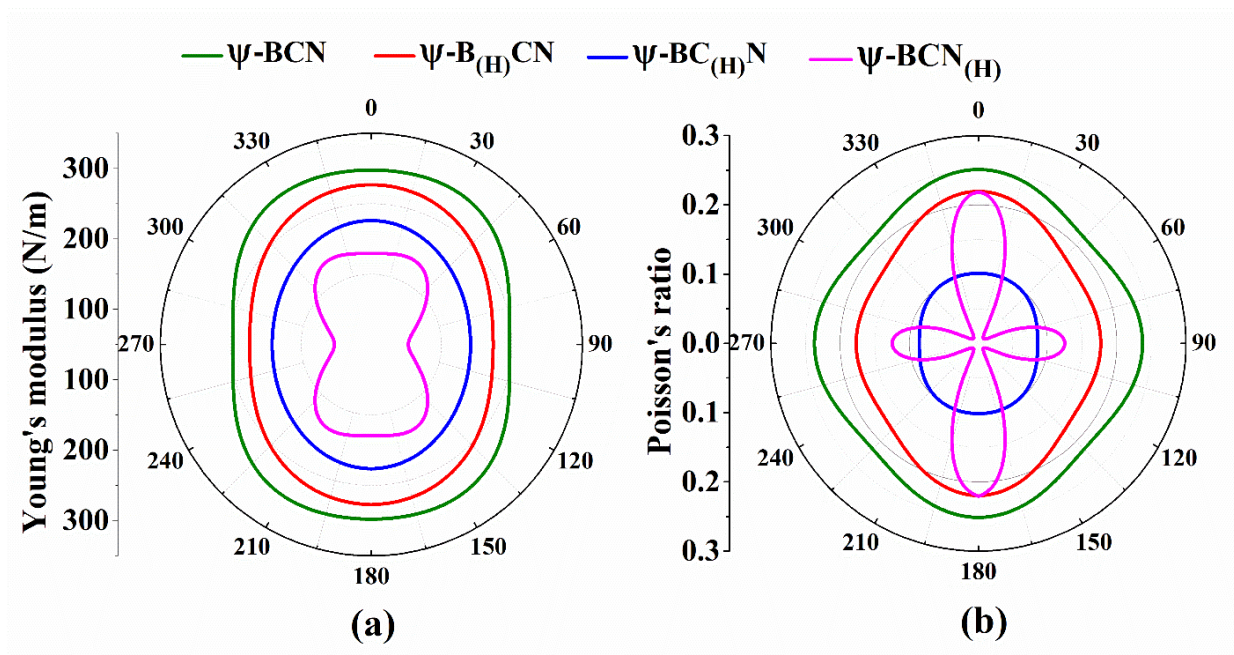

Figure S3

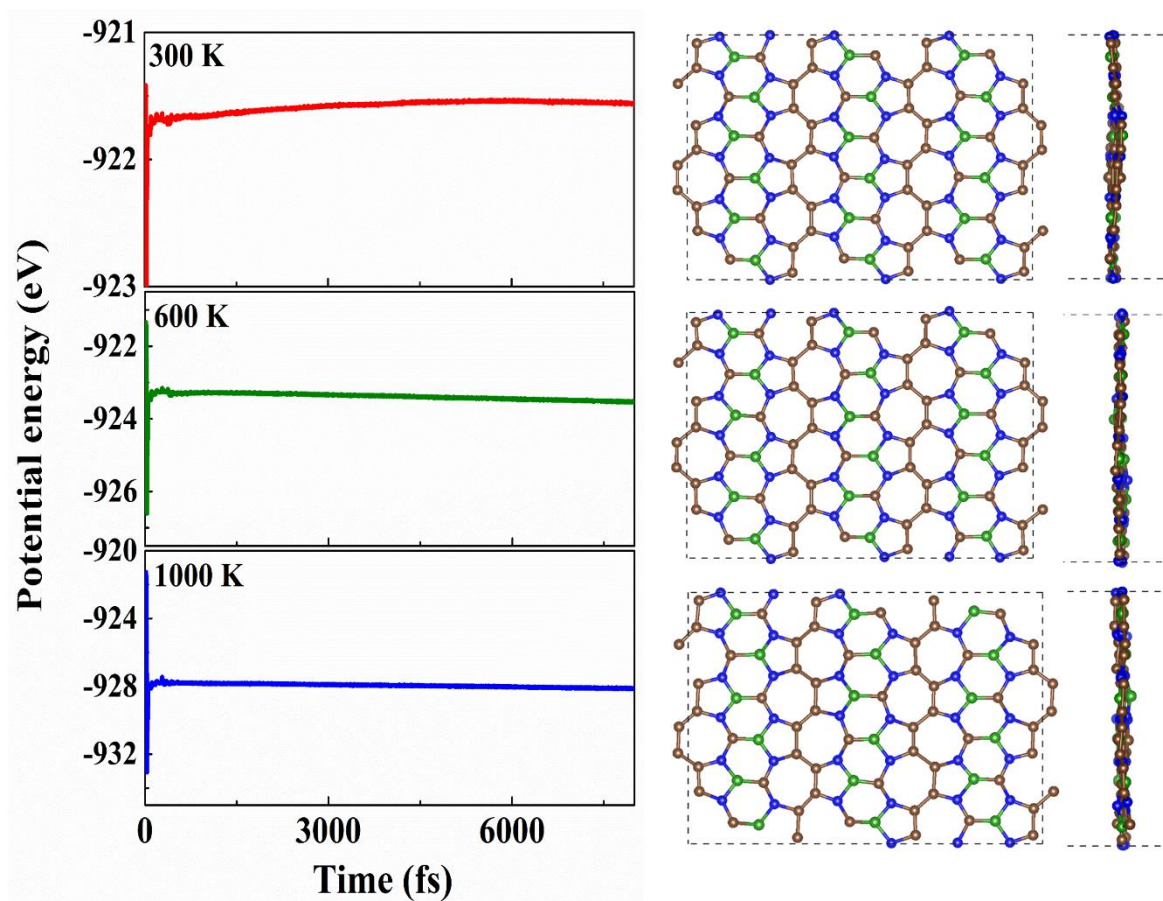

**Figure S4**

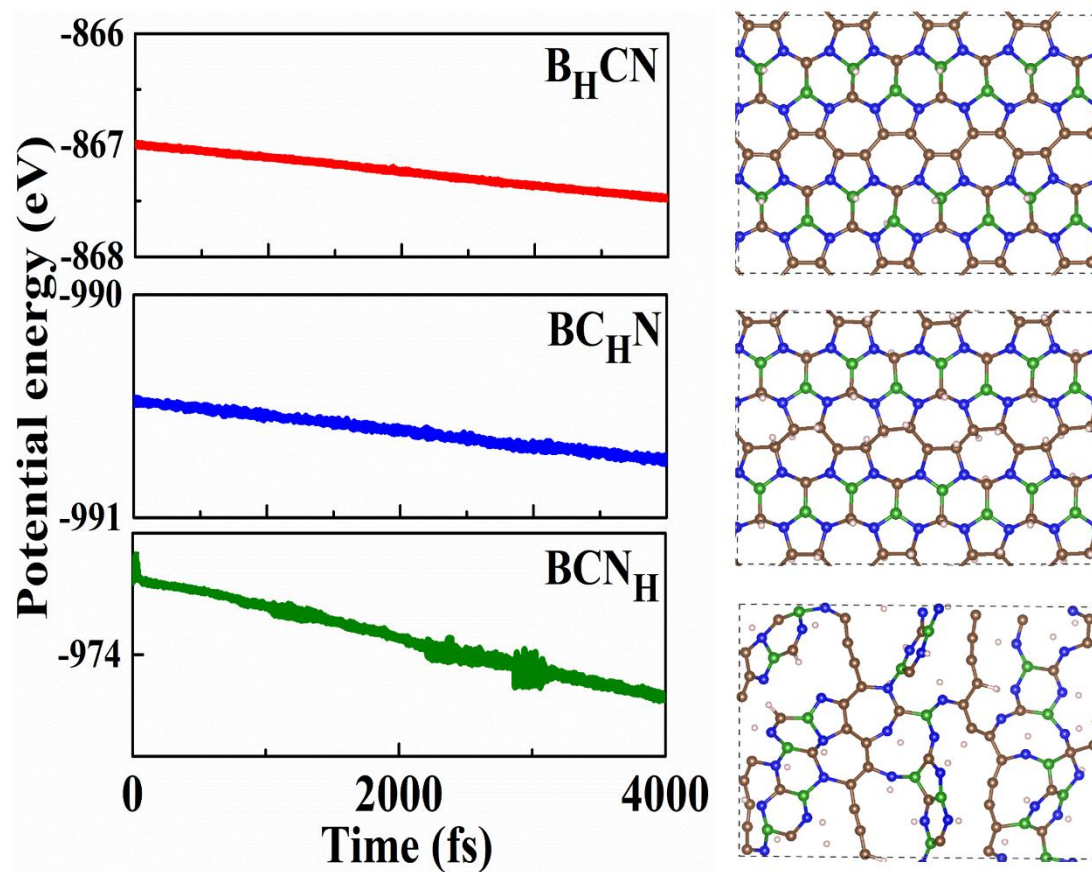

**Figure S5**

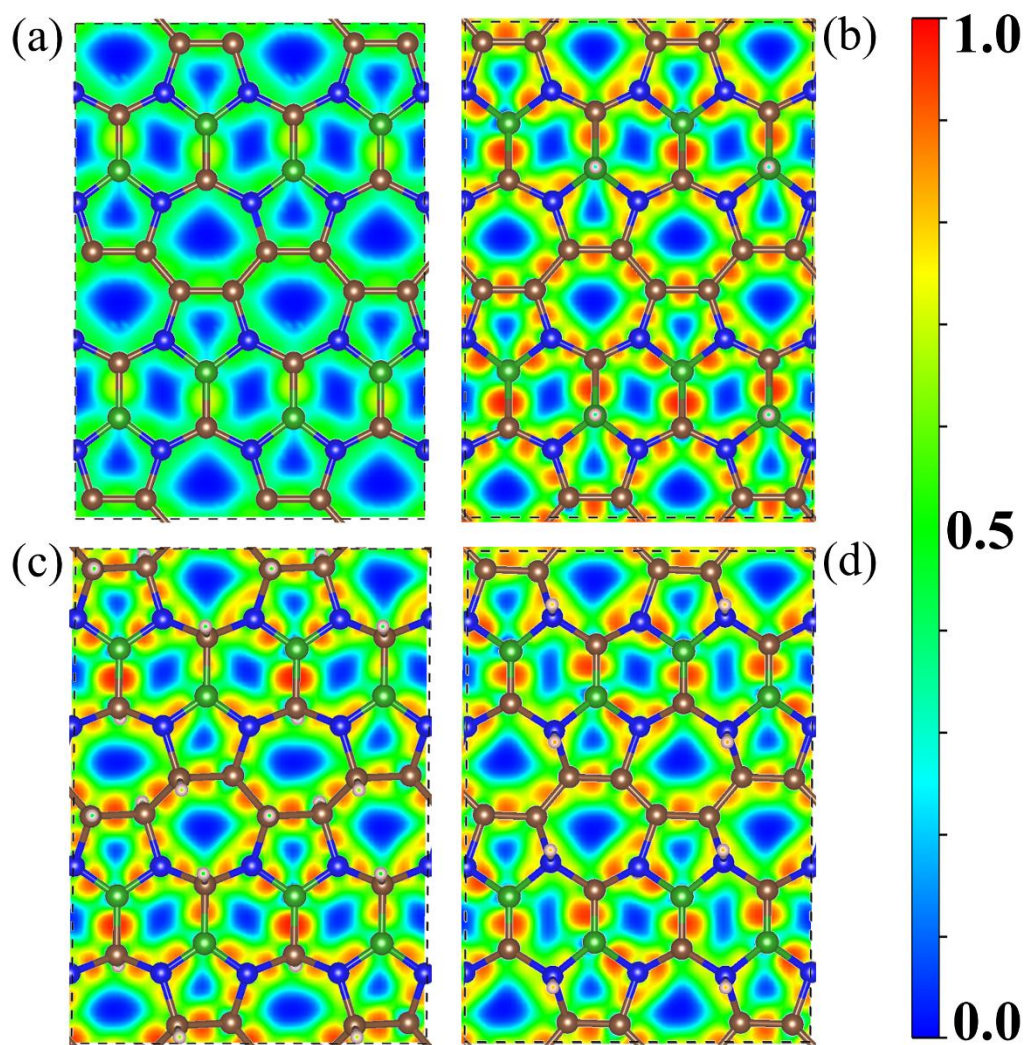

**Figure S6**
